# Supplementary material for: Selective hydrogenation of 5-hydroxymethylfurfural to 2,5-bis(hydroxymethyl)furan over Ni–Ga intermetallic catalysts and its kinetic studies
Source: Royal Society of Chemistry journal article supplement (doi:10.1039/d4re00129j), 2024-01-01
Supplement: d4re00129j1.pdf [file d4re00129j1.pdf]

## **Selective hydrogenation of 5-hydroxymethylfurfural to 2,5-bis(hydroxymethyl)furan over Ni–Ga intermetallic catalysts and its kinetic studies**

5 Weixiao Sun<sup>†</sup>, Fuzeyu Zhong<sup>†</sup>, Xiaohu Ge<sup>\*</sup>, Wenyao Chen, Gang Qian, Yueqiang Cao, Xuezhi Duan, Xinggui Zhou, Jing Zhang<sup>\*</sup>

State Key Laboratory of Chemical Engineering, School of Chemical Engineering, East China University of Science and Technology; Shanghai, 200237, China.

<sup>†</sup>These authors contributed equally to this work.

10 <sup>\*</sup>Corresponding author email: [xhge@mail.ecust.edu.cn](mailto:xhge@mail.ecust.edu.cn), [jingzhang8507@ecust.edu.cn](mailto:jingzhang8507@ecust.edu.cn)

# Contents

|    |                         |    |
|----|-------------------------|----|
|    | Supporting Figures..... | 3  |
|    | Fig. S1.....            | 3  |
|    | Fig. S2.....            | 4  |
| 5  | Fig. S3.....            | 5  |
|    | Fig. S4.....            | 6  |
|    | Fig. S5.....            | 7  |
|    | Fig. S6.....            | 8  |
|    | Fig. S7.....            | 9  |
| 10 | Fig. S8.....            | 10 |
|    | Fig. S9.....            | 11 |
|    | Fig. S10.....           | 12 |
|    | Fig. S11.....           | 13 |
|    | Fig. S12.....           | 14 |
| 15 | Fig. S13.....           | 15 |
|    | Supporting Tables.....  | 16 |
|    | Table S1.....           | 16 |
|    | Table S2.....           | 17 |
|    | Table S3.....           | 18 |
| 20 | Table S4.....           | 19 |
|    | Table S5.....           | 20 |
|    | Scheme S1.....          | 21 |

## Supporting Figures

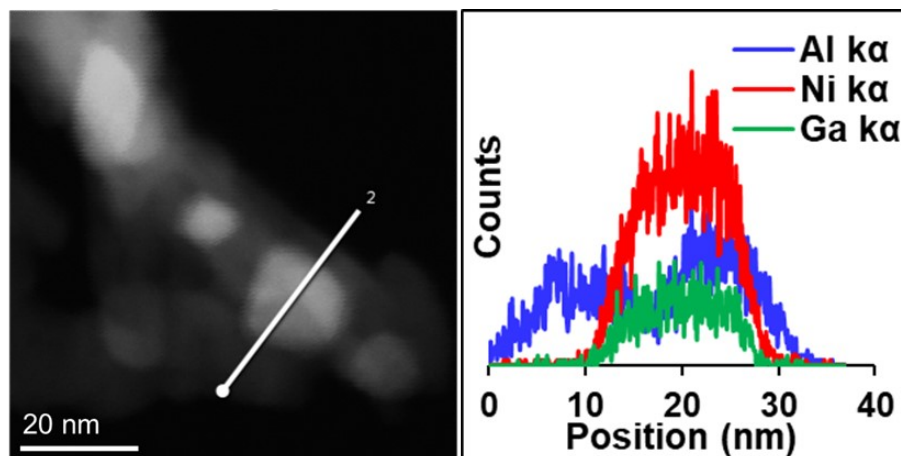

**Fig. S1.** EDX line scan of the  $\text{Ni}_1\text{Ga}_1$  intermetallic catalyst.

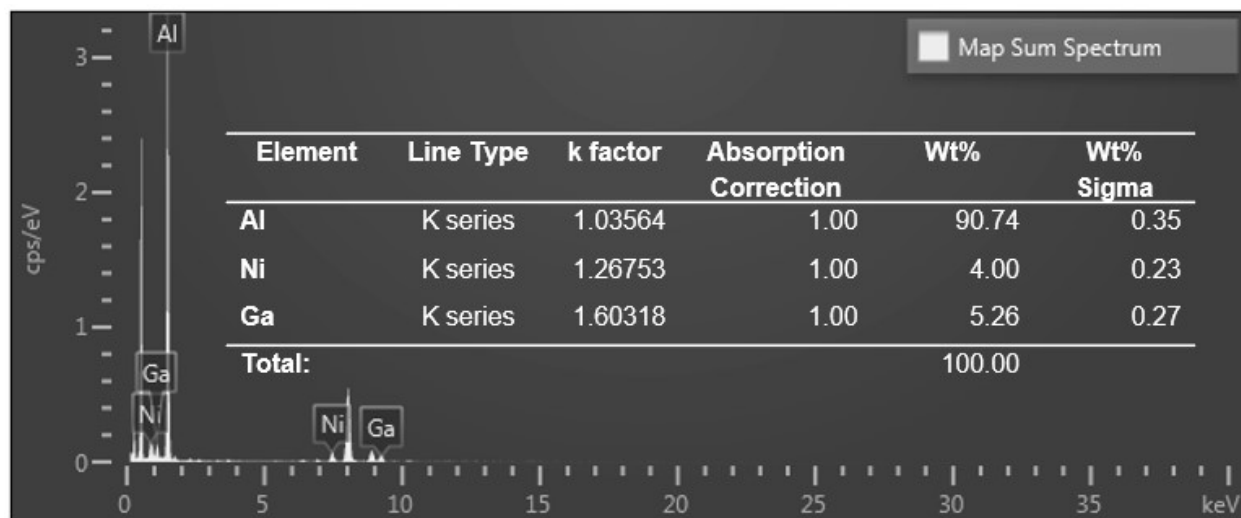

**Fig. S2.** The EDX spectra of the Ni<sub>1</sub>Ga<sub>1</sub> intermetallic catalyst and total distribution map spectrum.

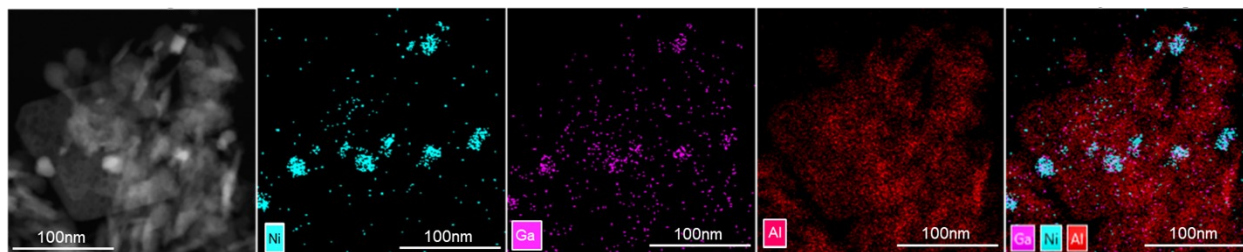

**Fig. S3.** EDS elemental mapping of the Ni<sub>1</sub>Ga<sub>1</sub> intermetallic catalyst.

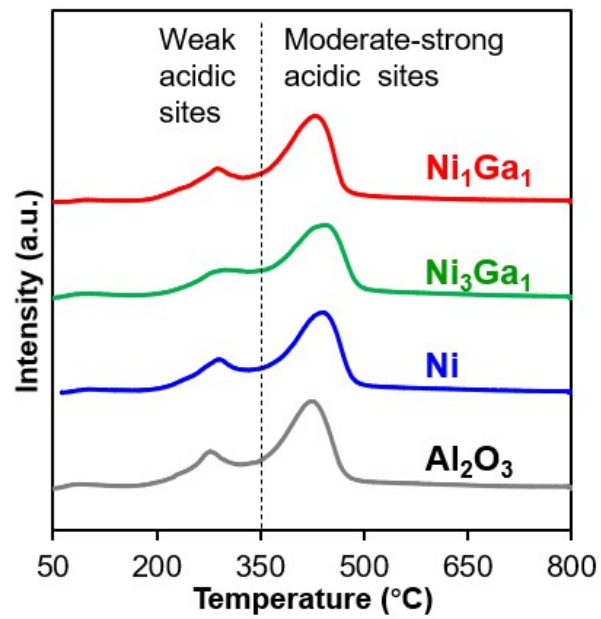

**Fig. S4.** NH<sub>3</sub>-TPD profiles of the referred Ni, Ni<sub>3</sub>Ga<sub>1</sub>, and Ni<sub>1</sub>Ga<sub>1</sub> catalysts.

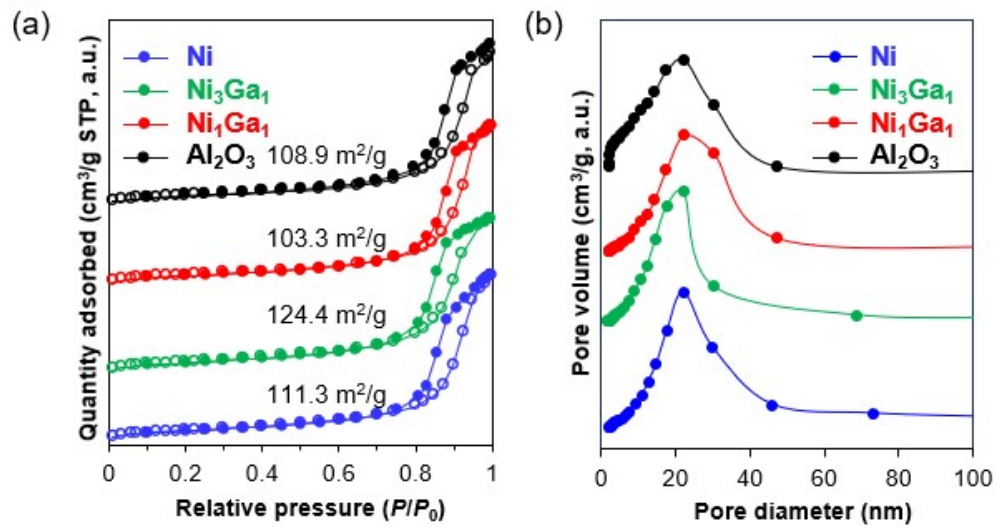

**Fig. S5.** (a) N<sub>2</sub> adsorption-desorption isotherms and (b) pore size distributions of the referred Ni, Ni<sub>3</sub>Ga<sub>1</sub>, Ni<sub>1</sub>Ga<sub>1</sub> intermetallic catalysts and Al<sub>2</sub>O<sub>3</sub> support.

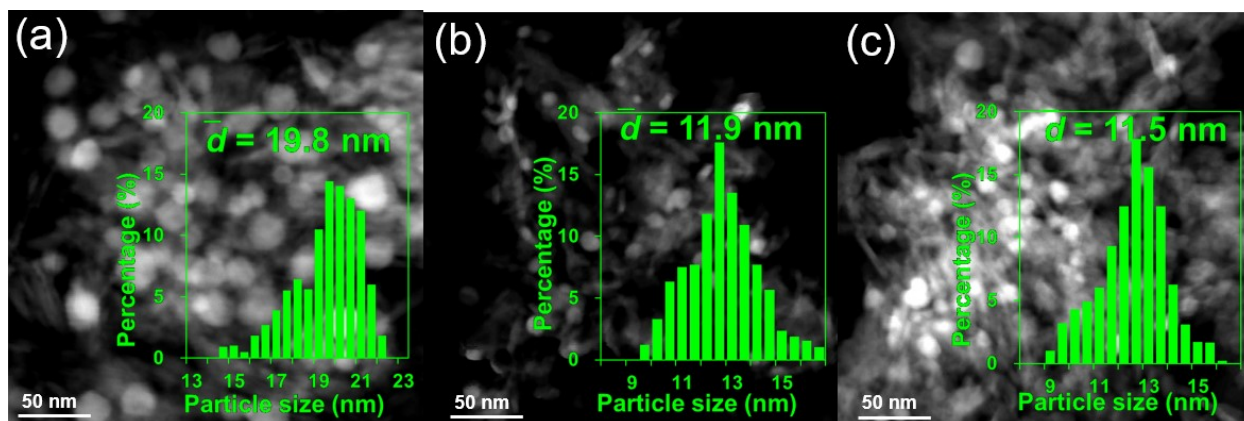

**Fig. S6.** HAADF-STEM images with corresponding particle size distribution of the post-reaction (a) referred Ni, (b)  $\text{Ni}_3\text{Ga}_1$ , and (c)  $\text{Ni}_1\text{Ga}_1$  intermetallic catalysts.



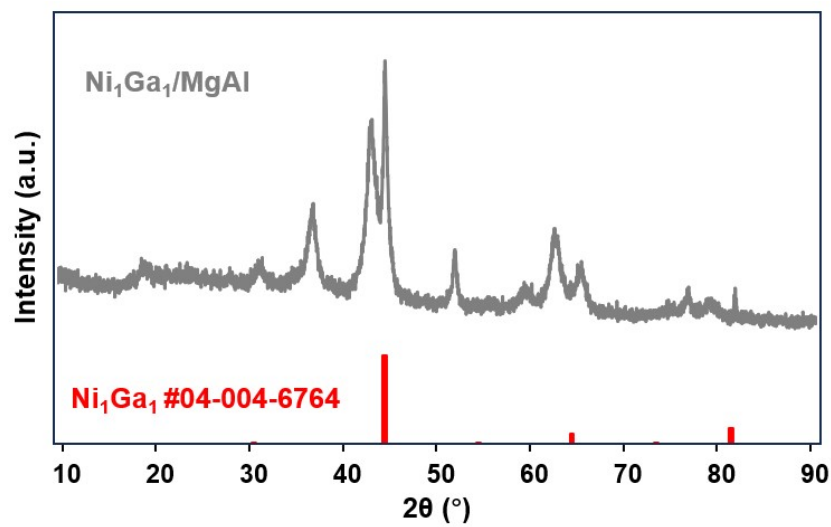

**Fig. S7.** XRD spectra of the  $\text{Ni}_1\text{Ga}_1/\text{MgAl}$  intermetallic catalyst.

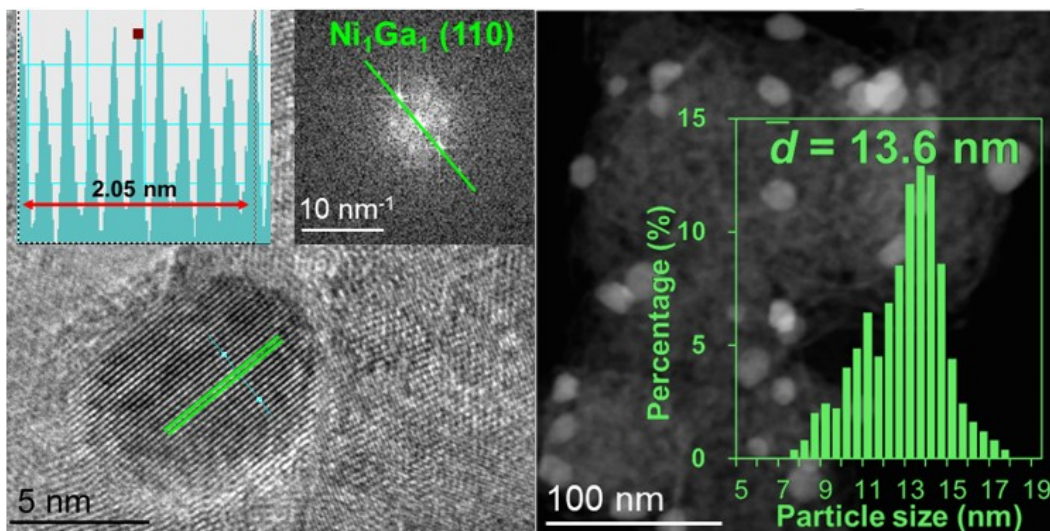

**Fig. S8.** HRTEM images with lattice fringes and FFT patterns, HAADF-STEM images with corresponding particle size distribution of the  $\text{Ni}_1\text{Ga}_1/\text{MgAl}$  intermetallic catalyst.

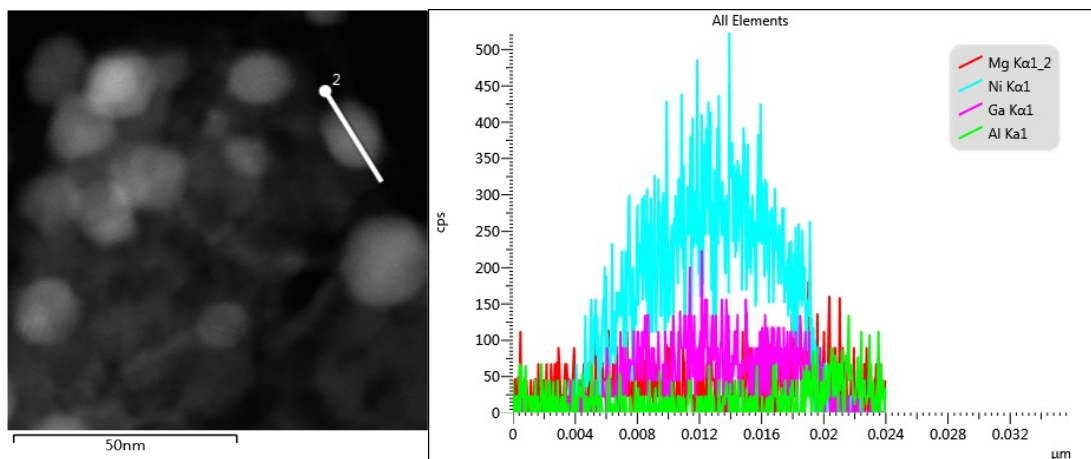

**Fig. S9.** EDX line scan of the  $\text{Ni}_1\text{Ga}_1/\text{MgAl}$  intermetallic catalyst.

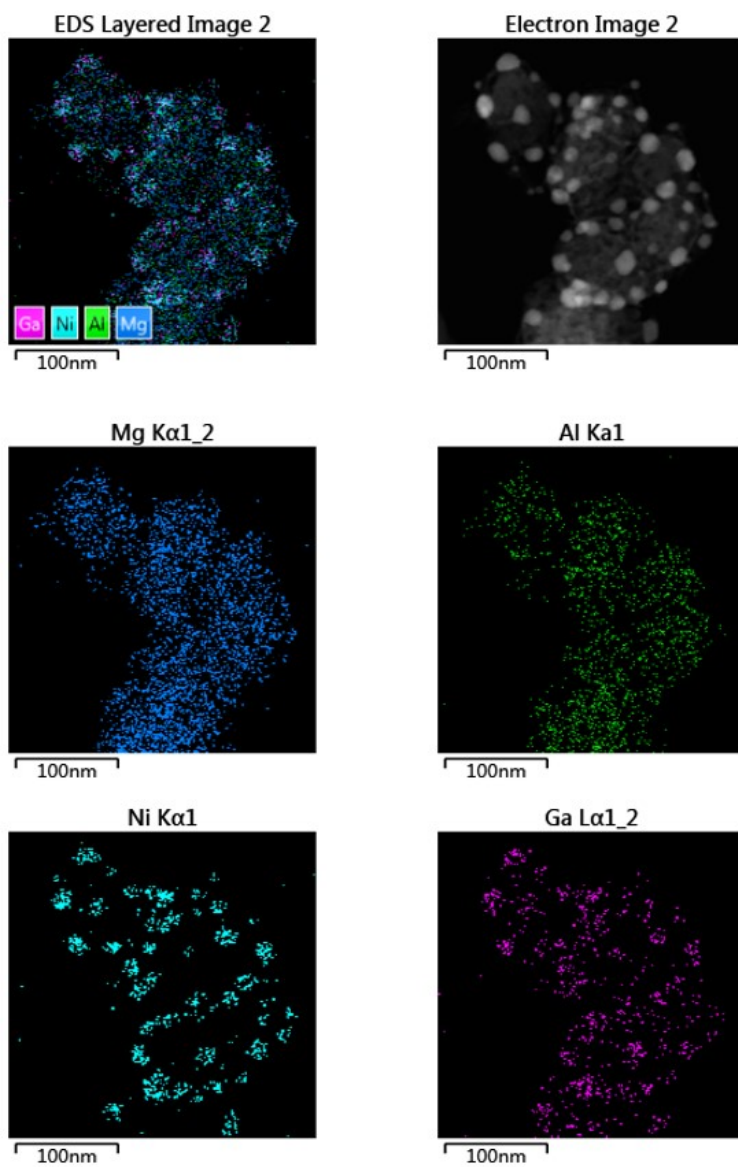

**Fig. S10.** EDS elemental mapping of the Ni<sub>1</sub>Ga<sub>1</sub>/MgAl intermetallic catalyst.

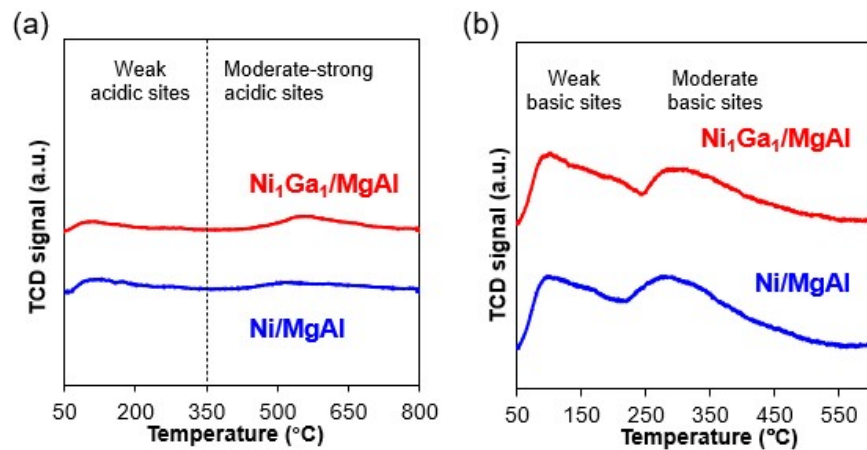

**Fig. S11.** NH<sub>3</sub>-TPD (a) and CO<sub>2</sub>-TPD (b) profiles of the referred Ni/MgAl and Ni<sub>1</sub>Ga<sub>1</sub>/MgAl catalysts.

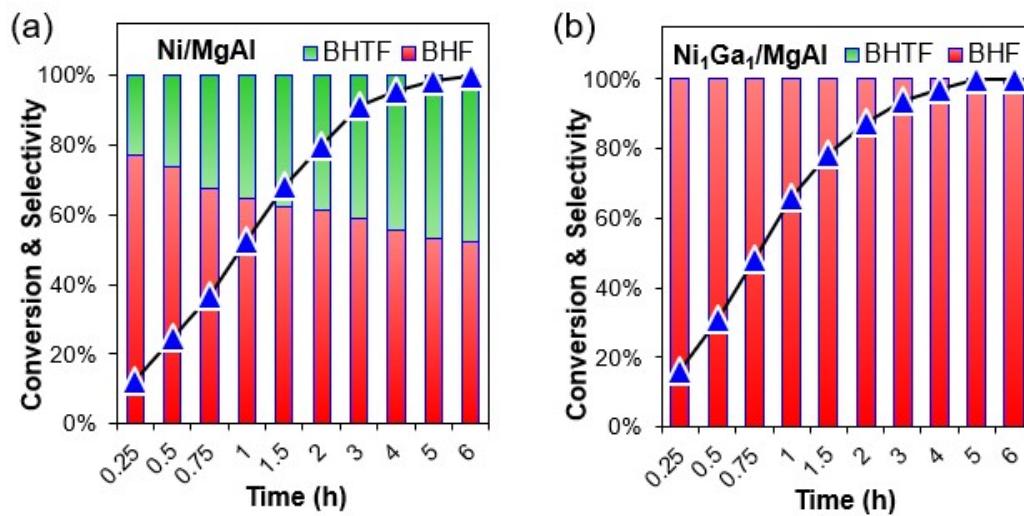

**Fig. S12.** Conversion of HMF (a) and selectivity of BHF (b) over the referred Ni/MgAl and Ni<sub>1</sub>Ga<sub>1</sub>/MgAl catalysts (reaction conditions: 20 mL H<sub>2</sub>O, 25 mg catalyst, 40 mg HMF, 3.0 MPa H<sub>2</sub>, 120 °C).

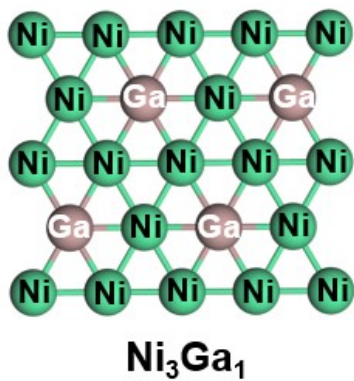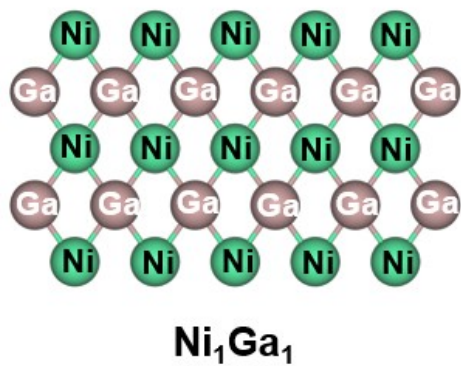

**Fig. S13.** The Ni atoms coordination environment of Ni<sub>3</sub>Ga<sub>1</sub> and Ni<sub>1</sub>Ga<sub>1</sub> intermetallics.

## Supporting Tables

**Table S1.** Binding energies & surface compositions (wt.%) of the referred Ni, Ni<sub>3</sub>Ga<sub>1</sub>, and Ni<sub>1</sub>Ga<sub>1</sub> catalysts measured by *in situ* XPS/ICP-MS.

| Catalyst                        | Binding energy (eV)               |                                   | Fraction (%)                                          |                                                       | Ni (wt.%) |     | Ga (wt.%) |     |
|---------------------------------|-----------------------------------|-----------------------------------|-------------------------------------------------------|-------------------------------------------------------|-----------|-----|-----------|-----|
|                                 | Ni <sup>0</sup> 2p <sub>3/2</sub> | Ga <sup>0</sup> 2p <sub>3/2</sub> | Ni <sup>0</sup> /(Ni <sup>0</sup> +Ni <sup>2+</sup> ) | Ga <sup>0</sup> /(Ga <sup>0</sup> +Ga <sup>3+</sup> ) | XPS       | ICP | XPS       | ICP |
| Ni                              | 852.9                             | /                                 | 74.4                                                  | /                                                     | 5.2       | 5.1 | /         | /   |
| Ni <sub>3</sub> Ga <sub>1</sub> | 852.7                             | 1116.2                            | 78.0                                                  | 61.3                                                  | 6.5       | 5.0 | 3.1       | 1.8 |
| Ni <sub>1</sub> Ga <sub>1</sub> | 852.5                             | 1116.4                            | 81.9                                                  | 54.4                                                  | 12.2      | 5.3 | 10.6      | 5.1 |

5



**Table S2.** ICP analysis of the post-reaction solution from the referred Ni, Ni<sub>3</sub>Ga<sub>1</sub>, and Ni<sub>1</sub>Ga<sub>1</sub> intermetallic catalysts after the recyclability test.

| Catalyst                        | Cycle | c <sub>Ni</sub> (mg/L) |
|---------------------------------|-------|------------------------|
| Ni                              | 1     | 1.85                   |
|                                 | 2     | 0.97                   |
|                                 | 3     | 0.90                   |
|                                 | 4     | 0.88                   |
| Ni <sub>3</sub> Ga <sub>1</sub> | 1     | 0.18                   |
|                                 | 2     | 0.10                   |
|                                 | 3     | 0.09                   |
|                                 | 4     | 0.05                   |
| Ni <sub>1</sub> Ga <sub>1</sub> | 1     | 0.15                   |
|                                 | 2     | 0.05                   |
|                                 | 3     | 0.08                   |
|                                 | 4     | 0.04                   |

**Table S3.** Catalytic performance of Al<sub>2</sub>O<sub>3</sub> catalysts.

| Catalyst                       | Conv. (%) | Select. BHF (%) | Select. BHTF (%) |
|--------------------------------|-----------|-----------------|------------------|
| Al <sub>2</sub> O <sub>3</sub> | <0.1      | -               | -                |

**Table S4.** Acidity of intermetallic Ni-Ga over Al<sub>2</sub>O<sub>3</sub>.

| Catalyst                        | Acidity (mmol/g) |
|---------------------------------|------------------|
| Al <sub>2</sub> O <sub>3</sub>  | 1.548            |
| Ni                              | 1.480            |
| Ni <sub>3</sub> Ga <sub>1</sub> | 1.503            |
| Ni <sub>1</sub> Ga <sub>1</sub> | 1.466            |

**Table S5.** Acidity and basicity of Ni<sub>1</sub>Ga<sub>1</sub>/MgAl intermetallic catalysts.

| Catalyst                              | Acidity (mmol/g) | Basicity (mmol/g) |
|---------------------------------------|------------------|-------------------|
| Ni/MgAl                               | 0.114            | 0.180             |
| Ni <sub>1</sub> Ga <sub>1</sub> /MgAl | 0.142            | 0.150             |

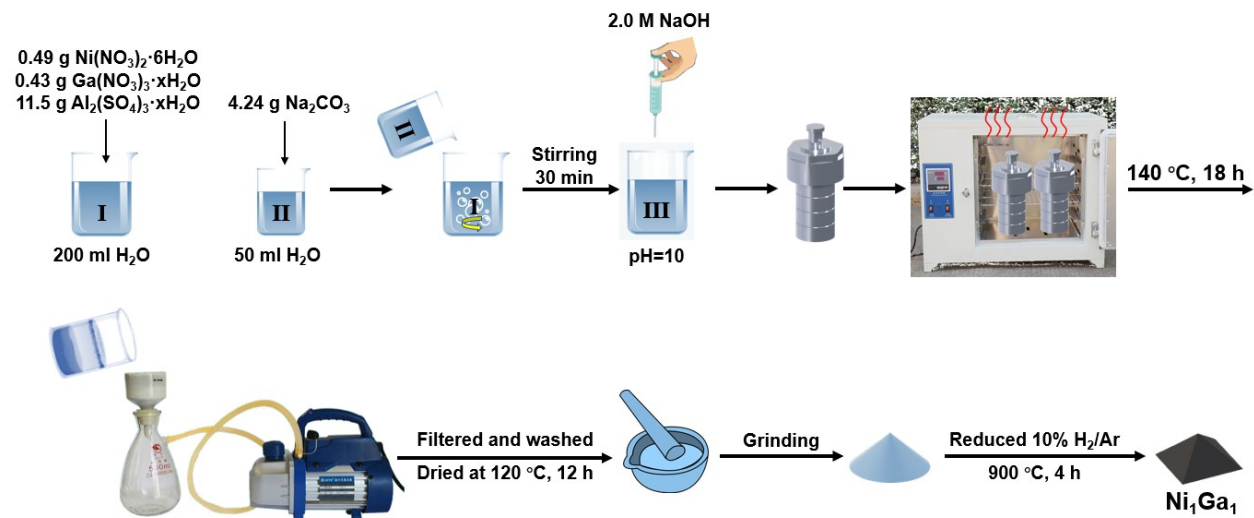

**Scheme S1.** The schematic diagram of  $\text{Ni}_1\text{Ga}_1$  catalyst preparation.
